# Supplementary material for: Socio-economic Factors Affecting FertilizationSustainability in Bangladesh: Effects of Traditional Way of Fertilization and Rental Land Farming
Source: Preprints.org preprint supplement (doi:10.20944/preprints201711.0078.v1), 2017-11-13
Supplement: Supplementary file 1 [file supplementary]

**Semi-structured interviews**

**Date:**

**Thank you for your participation in the interview.**

**The interview is anonymous and its results will be used only for scientific purposes.**

**Part-I: Personal data**

(Please tick and write about yourself)

1. Sex : Male Female

1. Age :
2. Education (Please tick)

| Illiterate |  |
| --- | --- |
| Primary |  |
| Secondary |  |
| Vocational agricultural |  |
| Secondary agricultural |  |
| Higher secondary agricultural (up to 12 grades) |  |

1. Agriculture is my only source of income-

YES NO

So, your monthly income in BDT

1. Your family members
2. My income is enough to bear the expenses of my family

YES NO

1. If it is not enough how you manage the family expenses-

**Part 2: Farmers’ Knowledge about Fertilization Sustainability**

(Please tick according to your opinion)

1. I have already known the concept of fertilization sustainability-

YES NO

1. I am conscious about agro environment

YES NO

How?

1. I have adopted training on fertilizer application (or on agriculture)-

YES NO

If no, how have you been familiar with fertilization?

1. I have learned fertilizer use from my nearby senior farmers (traditional way of fertilization)-

YES NO

1. Do you use a large amount of fertilizers for gaining more crops?

YES NO

**Part 3: Farming Capitals** (Please tick according to your opinion)

1. I have no own farmlands-

YES NO

If no, do you cultivate others’ land (rental land)?

YES NO

1. I usually apply an excessive amount of fertilizers in rental lands-

YES NO

1. I use nitrogen fertilizer (N) excessively-

YES NO

Why?

1. Nitrogen fertilizer is easy to collect and inexpensive-

YES NO

**Part 4: Fertilizer governance** (Please tick mark)

1. Field agriculture/fertilizer administration visit regularly farmers/farming areas (cooperative or non-cooperative)

YES NO

If yes, officers provide important guidance us on sustainable fertilization-

1. I have been able to test my land soil by government soil testing center-

YES NO

If no, why?

***THANK YOU***

***The questionnaire is anonymous but if you give your consent to contact you in case any additional questions arise please leave your phone number or e-mail.***

***Moreover, in case of questions please contact us at: atik73@i.shu.edu.cn***
